# Supplementary material for: Noninvasive rapid bacteria-killing and acceleration of wound healing through photothermal/photodynamic/copper ion synergistic action of a hybrid hydrogel
Source: Royal Society of Chemistry journal article supplement (doi:10.1039/c8bm00499d), 2018-01-01
Supplement: c8bm00499d1.pdf [file c8bm00499d1.pdf]

## Electronic Supplementary Information

### Noninvasive Rapid Bacteria-Killing and Acceleration of Wound Healing through Photothermal/Photodynamic/Copper Ions Synergistic Action of a Hybrid hydrogel

Mu Li,<sup>a</sup> Xiangmei Liu,<sup>a,\*</sup> Lei Tan,<sup>a</sup> Zhenduo Cui,<sup>b</sup> Xianjin Yang,<sup>b</sup> Zhaoyang Li,<sup>b</sup> Yufeng Zheng,<sup>c</sup> Kelvin Wai Kwok Yeung,<sup>d</sup> Paul K. Chu,<sup>e</sup> Shuilin Wu,<sup>a,b,\*</sup>

<sup>a</sup>. Hubei Collaborative Innovation Center for Advanced Organic Chemical Materials, Ministry-of-Education Key Laboratory for the Green Preparation and Application of Functional Materials, Hubei Key Laboratory of Polymer Materials, School of Materials Science & Engineering, Hubei University, Wuhan 430062, China

<sup>b</sup>. School of Materials Science & Engineering, Tianjin University, Tianjin 300072, China. E-mail: shuilin.wu@gmail.com; shuilinwu@tju.edu.cn (S.L. Wu)

<sup>c</sup>. State Key Laboratory for Turbulence and Complex System and Department of Materials Science and Engineering, College of Engineering, Peking University, Beijing 100871, China

<sup>d</sup>. Department of Orthopaedics & Traumatology, Li Ka Shing Faculty of Medicine, The University of Hong Kong, Pokfulam, Hong Kong 999077, China

<sup>e</sup>. Department of Physics and Department of Materials Science and Engineering, City University of Hong Kong, Tat Chee Avenue, Kowloon, Hong Kong 999077, China

**Table S1** Primer sequences used in real time Q-RT-PCR.

| Gene           | Primer sequences               | T <sub>m</sub> (°C) |
|----------------|--------------------------------|---------------------|
| VEGF           | F:5'TGCGGATCAAACCTCACCA3'      | 58                  |
|                | R:5'CAGGGATTTTCTTGCTTGCT3'     |                     |
| bFGF           | F:5'ATGGCAGCCGGGAGCATCACCC3'   | 60                  |
|                | R:5'CACACACTCCTTTGATAGACACAA3' |                     |
| HIF-1 $\alpha$ | F:5'CCATGTGACCATGAGGAAAT3'     | 60                  |
|                | R:5'CGGCTAGTTAGGGTACACTT3'     |                     |
| GAPDH          | F:5'GATTTGGTCGTATTGGGCG3'      | 60                  |
|                | R:5'CTGGAAGATGGTGATGG3'        |                     |

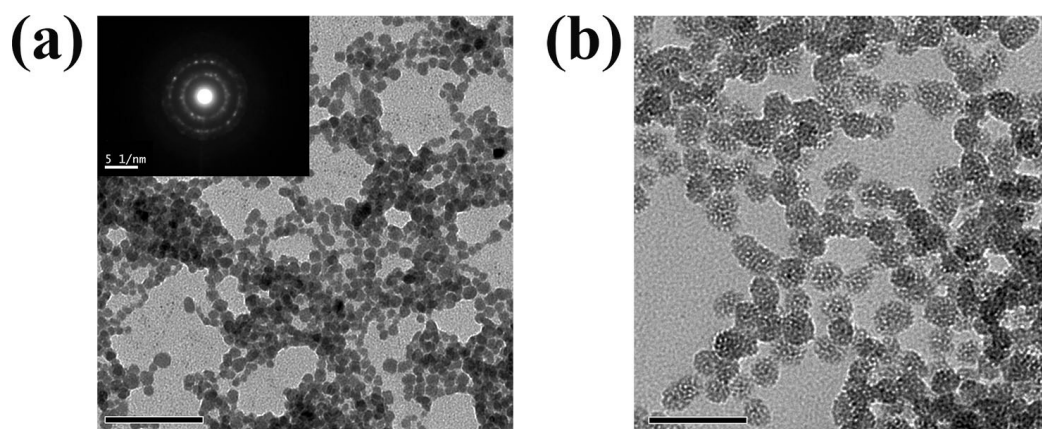

**Fig. S1** Morphological characterization of the CuS and CuS/mSiO<sub>2</sub> NPs. TEM images of: (a) CuS NPs and (b) CuS/mSiO<sub>2</sub> NPs (Scale bar = 100 nm).

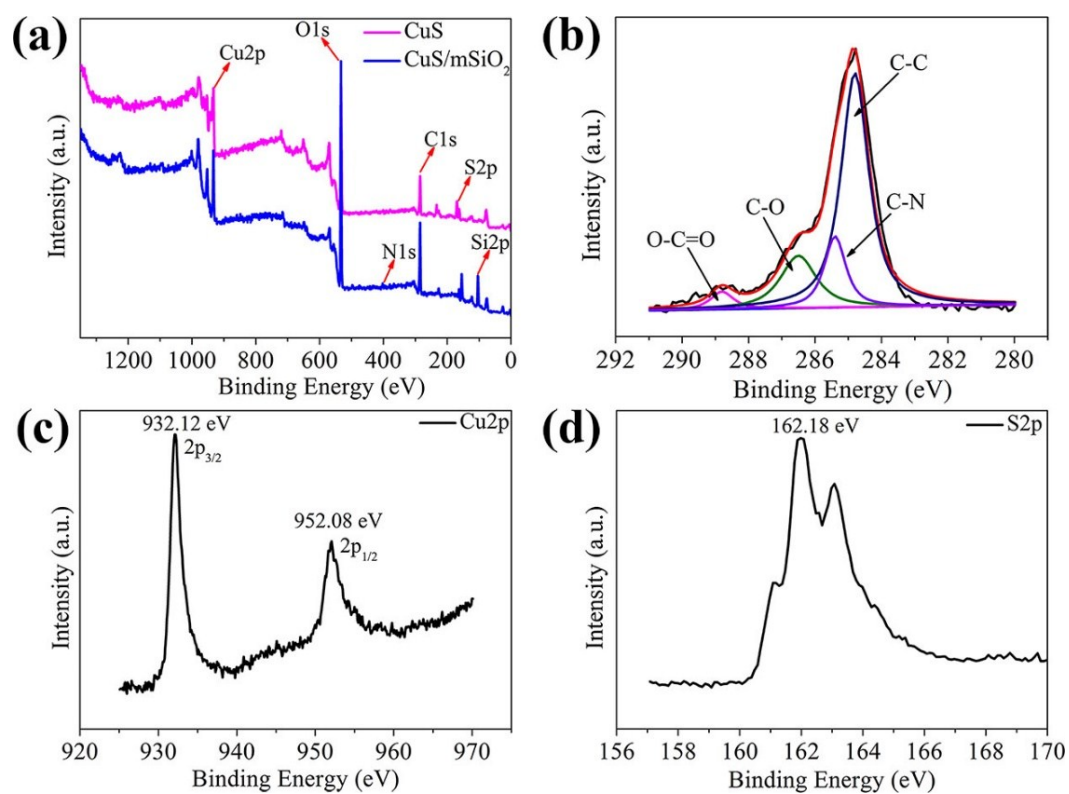

**Fig. S2** XPS analysis: (a) Survey spectra of the CuS and CuS/mSiO<sub>2</sub> NPs, (b) C 1s peak of the CuS/mSiO<sub>2</sub> NPs, (c) Cu  $2p_{3/2}$  and  $2p_{1/2}$  and (d) S 2p of the CuS/mSiO<sub>2</sub> NPs.

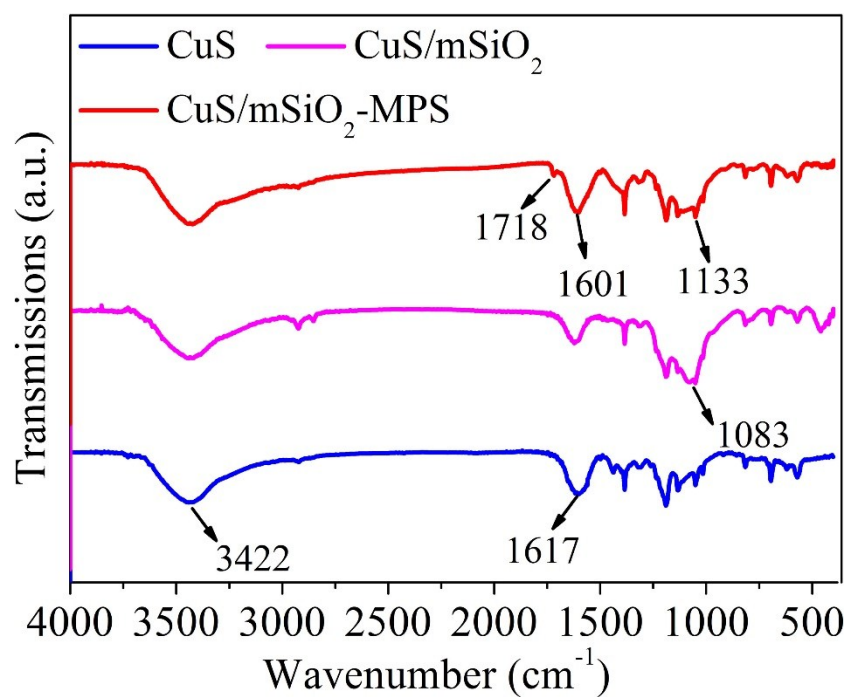

**Fig. S3** FTIR spectra of the CuS, CuS/mSiO<sub>2</sub>, and CuS/mSiO<sub>2</sub>-MPS NPs.

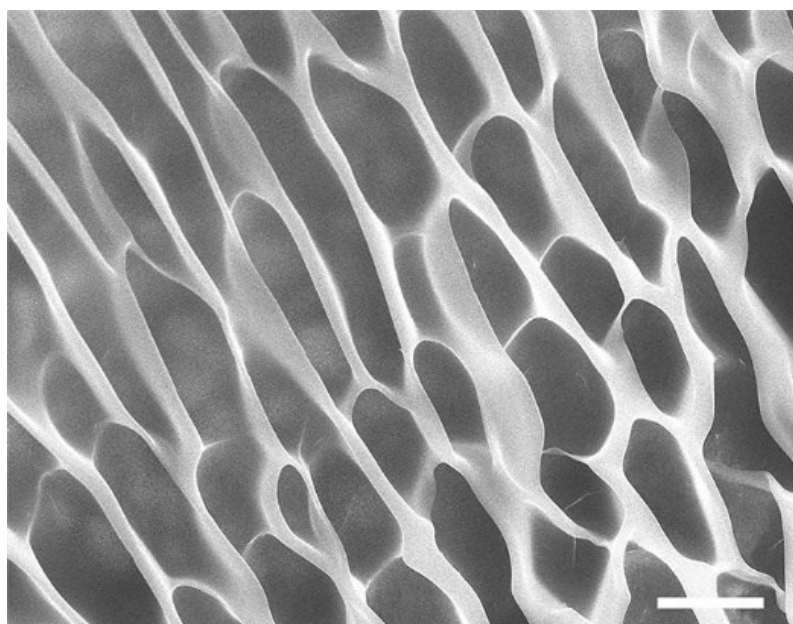

**Fig. S4** SEM image of the representative network in the pure hydrogel. Scale bar, 5  $\mu\text{m}$ .

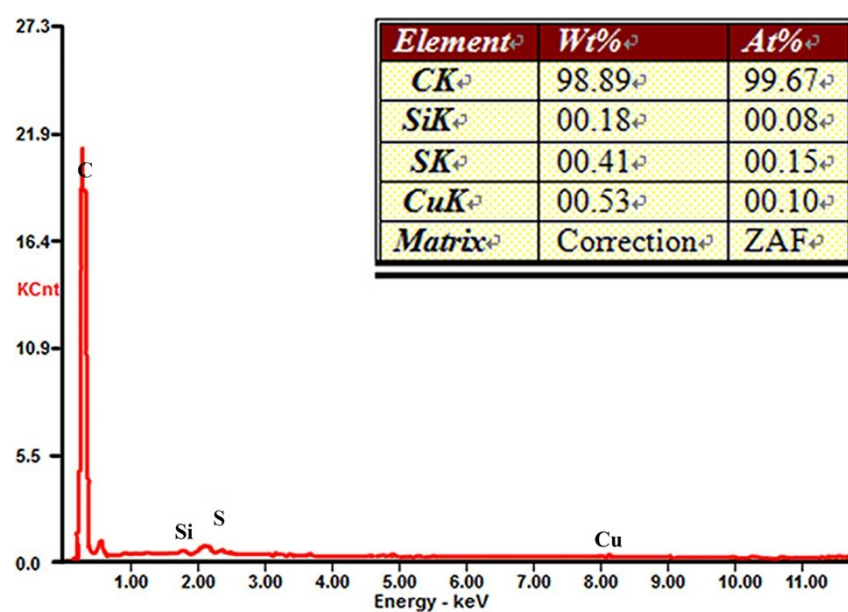

Fig. S5 EDS analysis of the NPs-Hydrogel.

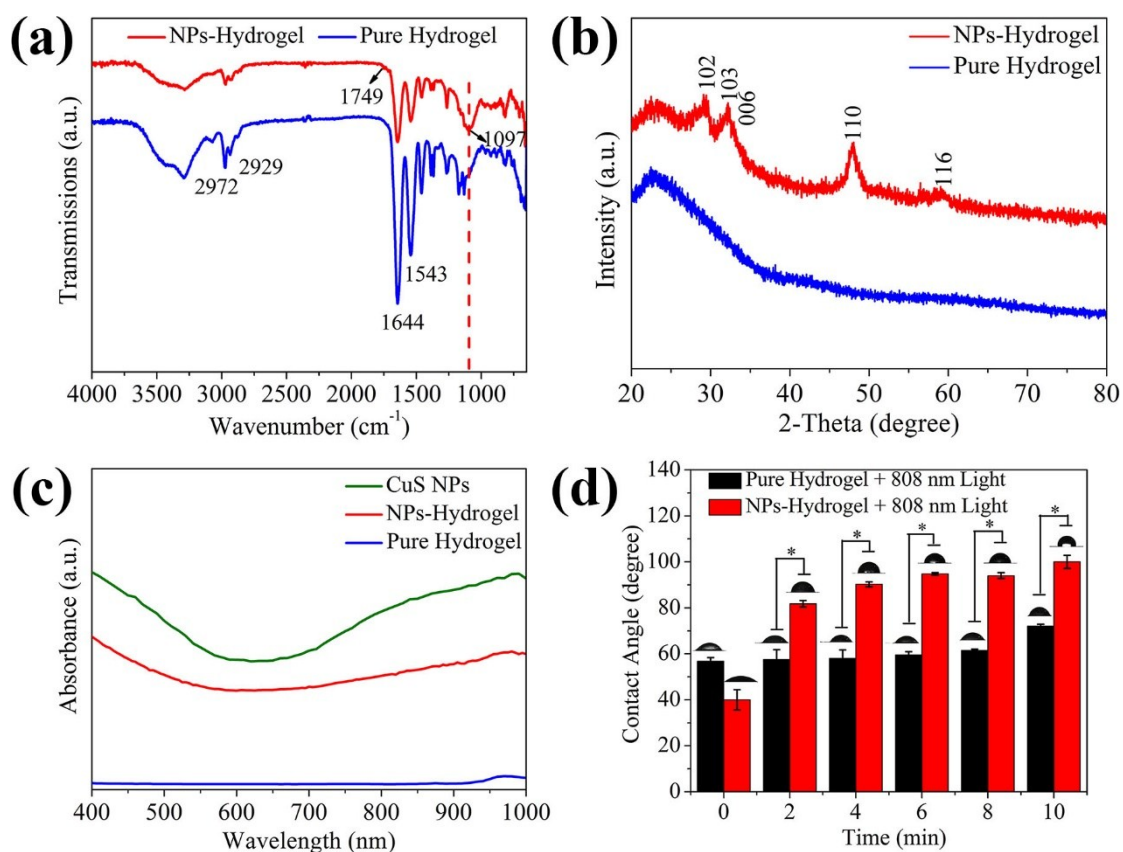

**Fig. S6** (a) FTIR spectra of pure hydrogel and NPs-Hydrogel. (b) XRD patterns of pure hydrogel and NPs-Hydrogel. (c) UV-Vis-NIR absorbance spectra of the as-prepared CuS NPs, NPs-Hydrogel, and pure hydrogel. (d) Water contact angle (WCA) on pure hydrogel and NPs-Hydrogel under NIR light irradiation. The error bars indicate means  $\pm$  standard deviations: \* $P < 0.05$ , \*\* $P < 0.01$ , and \*\*\* $P < 0.001$ .



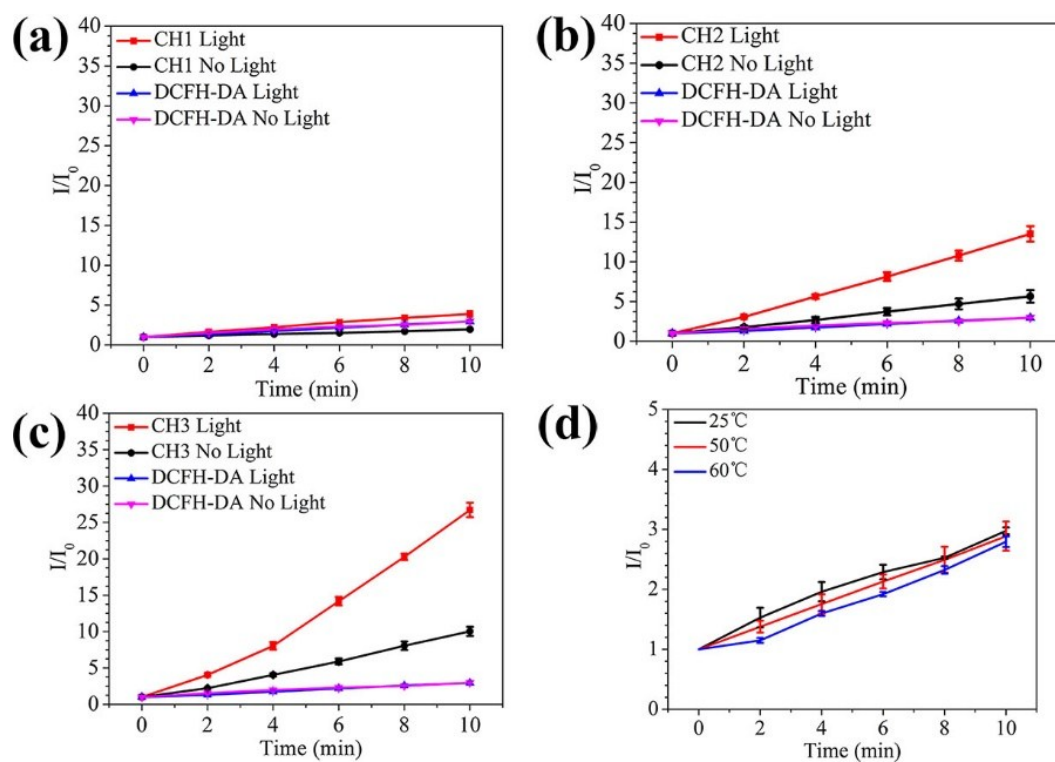

**Fig. S7** Fluorescence intensity (FI) of DCF at 525 nm: (a) CH1, (b) CH2, and (c) CH3 with and without light; (d) FI of DCFH-DA dyes at different temperature.

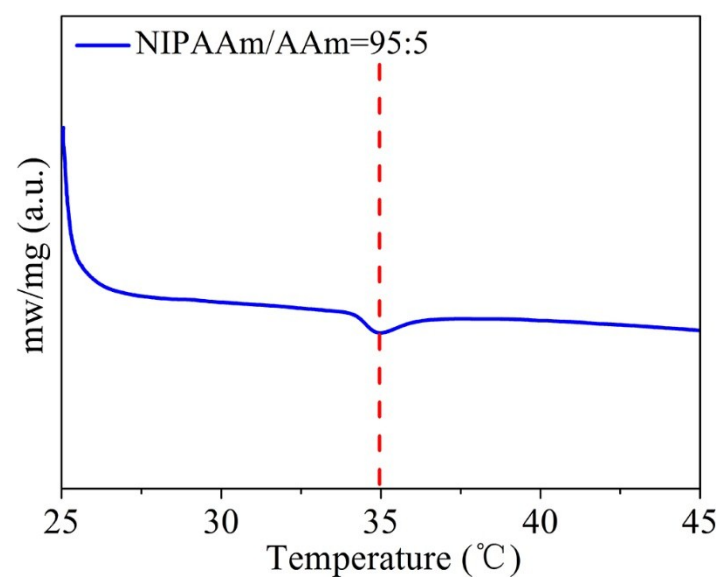

**Fig. S8** DSC curves of NIPAAm and AAm with a molar ratio at 95:5.

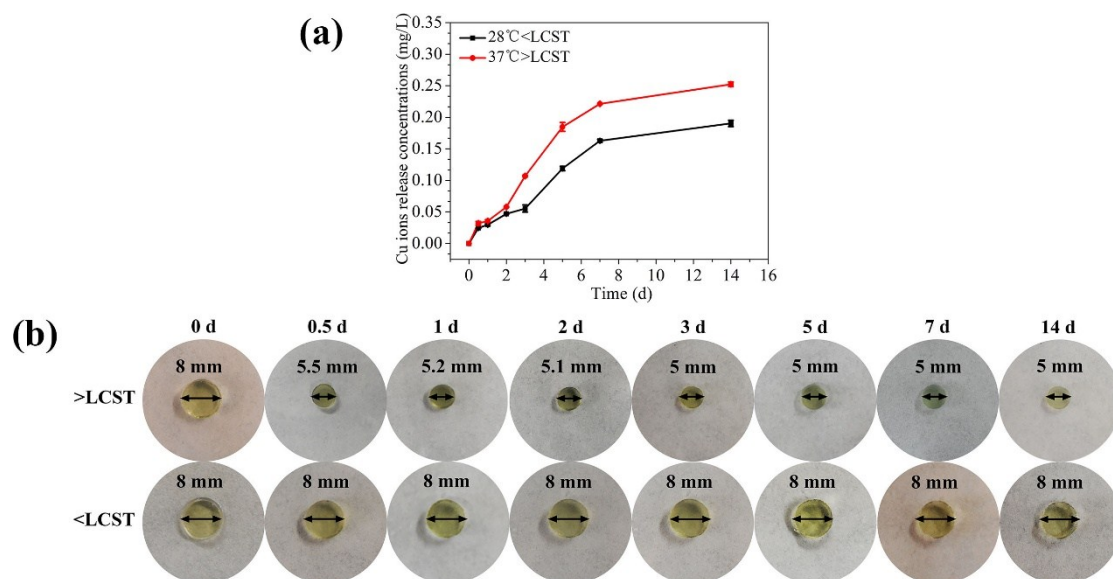

**Fig. S9** (a) Cumulative Cu ion release profiles from the hydrogel CH3 at 28 °C (<LCST) and 37 °C (>LCST), respectively. (b) Optical images corresponding to the temperature-stimulated volume transitions of the hydrogel at different temperature, 28 °C (<LCST) and 37 °C (>LCST).

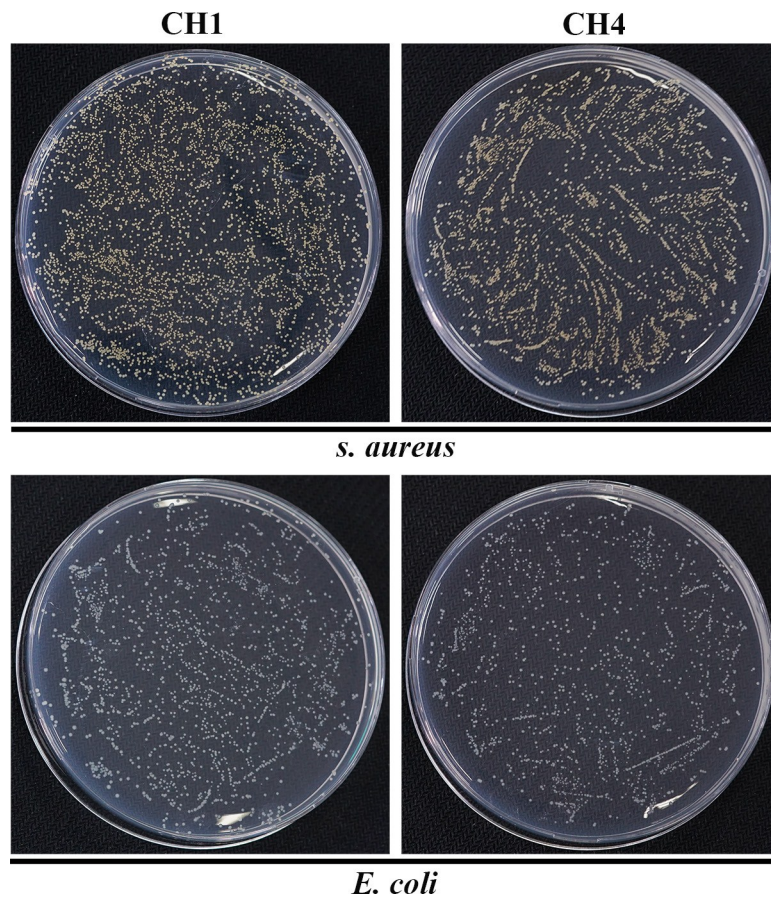

**Fig S10** Spread plate results of *S. aureus* and *E. coli*, with the antibacterial experiments of samples CH1 and CH4 were done in an ice bath.

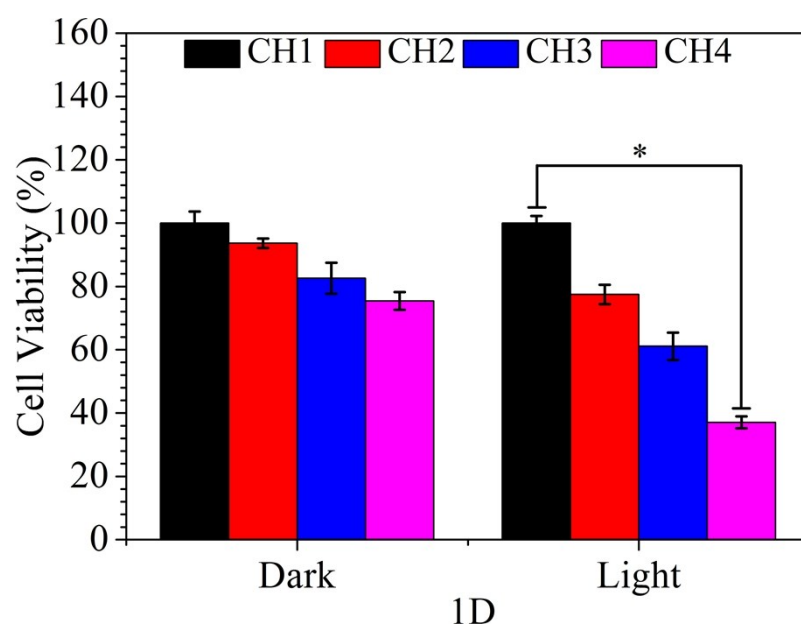

**Fig. S11** Cell viability of NIH-3T3 treated with hydrogels CH1, CH2, CH3, and CH4 at day 1, after irradiated for 10 min with 808 nm light or cultured without light irradiation, respectively. The error bars indicate means  $\pm$  standard deviations: \* $P < 0.05$ , \*\* $P < 0.01$ , and \*\*\* $P < 0.001$ .

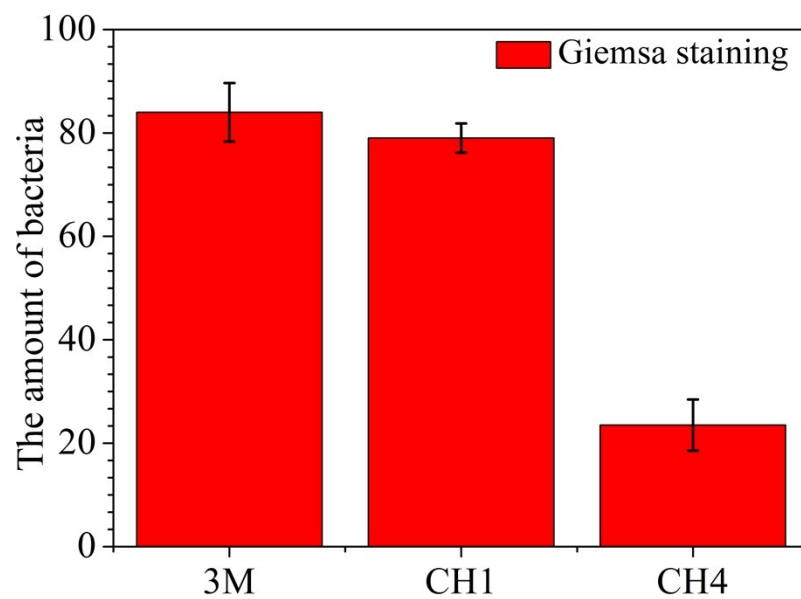

**Fig. S12** The amount of bacteria stained by Giemsa. The experiments are performed in triplicate and independently.

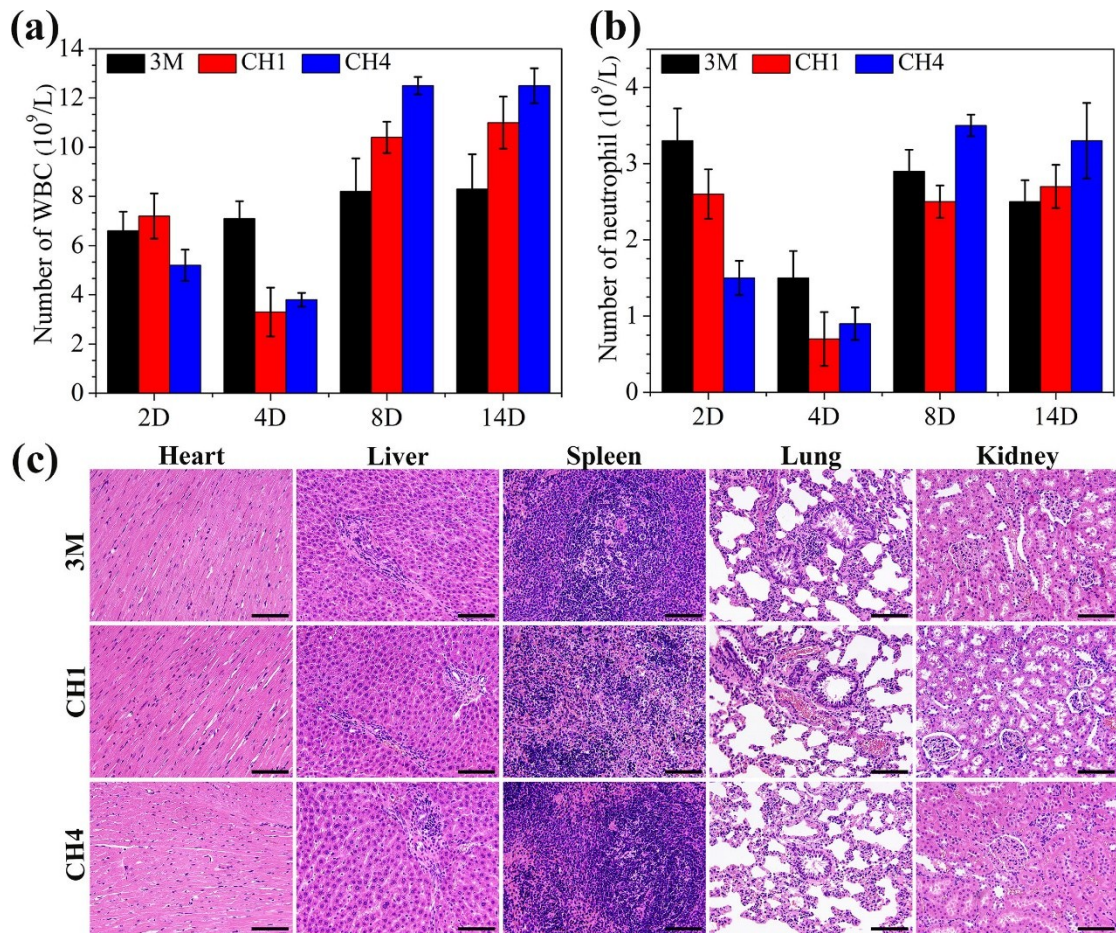

**Fig. S13** *In vivo* blood routine analysis of (a) WBCs and (b) neutrophils in the whole blood extracted from the rats after treating with different dressings (3M, CH1, and CH4) for 2, 4, 8, and 14 days. (c) H&E staining of the heart, liver, spleen, lung, and kidney tissue slices after 14-day treatment for the different groups. Scale bars are 100  $\mu$ m and the experiments are performed in triplicate and independently.
